# Supplementary material for: Exploring Limiting Factors of Wear in Pitch Bearings of Wind Turbines with Real Scale Tests
Source: Copernicus journal article supplement (doi:10.5194/wes-2022-96), 2022-11-01

# Supplement AC3 on RC1 to “Exploring Limiting Factors of Wear in Pitch Bearings of Wind Turbines with Real Scale Tests”

Equation 1

$$\Delta M = (\ddot{\varphi}_1 - \ddot{\varphi}_2) \cdot 3 \cdot I_{OR} = 1.4 \text{ kN}$$

Speed an Acceleration of Test ID III

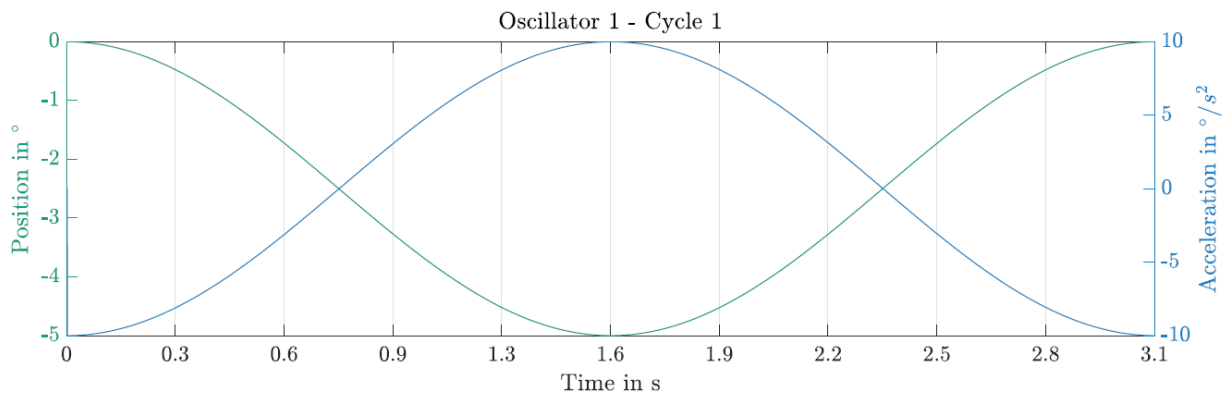

Speed an Acceleration of Test ID IV

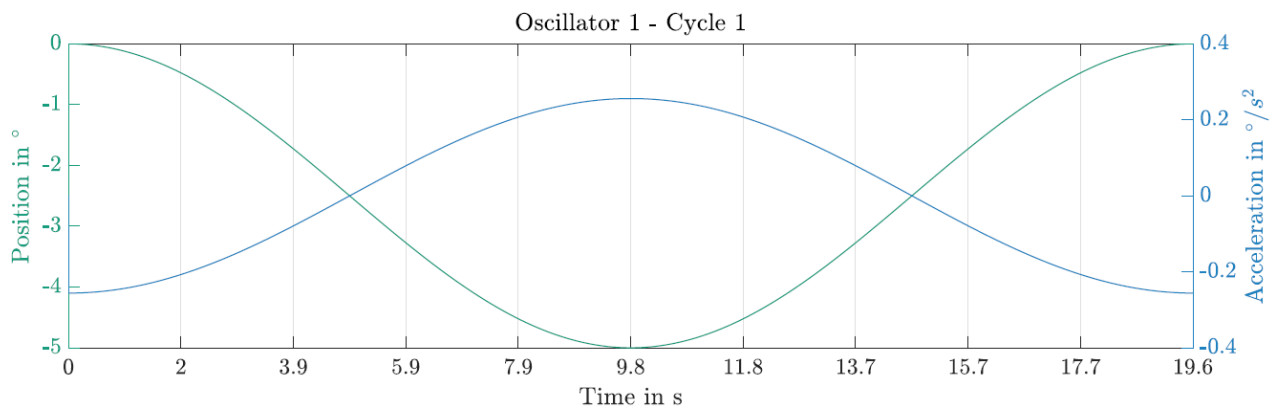

Supplement: Supplementary file [file wes-2022-96-AC3-supplement.pdf]
