# Supplementary material for: Exploring Limiting Factors of Wear in Pitch Bearings of Wind Turbines with Real Scale Tests
Source: Copernicus journal article supplement (doi:10.5194/wes-2022-96), 2022-11-01
Supplement: Supplementary file [file wes-2022-96-AC4-supplement.pdf]

**Supplement AC4 on RC4 to  
"Exploring Limiting Factors of Wear in Pitch Bearings of Wind  
Turbines with Real Scale Tests"**

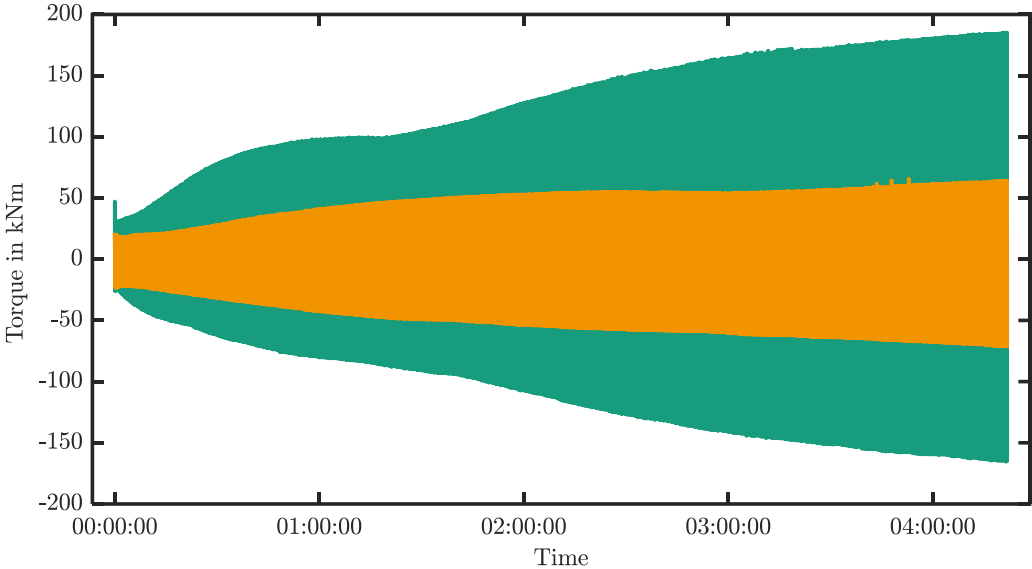

Figure 1: Friction torque over time of Test ID I and ID II
